# Supplementary material
Source: MDPI journal article supplement (https://www.mdpi.com/2076-3417/9/17/3440)
Supplement: s1 [file s1]

Supplementary materials

# Ion Channel Properties of a Cation Channelrhodopsin, *Gt\_CCR4*

Shunta Shigemura <sup>1</sup>, Shoko Hososhima <sup>1</sup>, Hideki Kandori <sup>1,2</sup> and Satoshi P. Tsunoda <sup>1,3,\*</sup>

<sup>1</sup> Department of Life Science and Applied Chemistry, Nagoya Institute of Technology, Showa-ku, Nagoya 466-8555, Japan

<sup>2</sup> OptoBio Technology Research Center, Nagoya Institute of Technology, Showa-ku, Nagoya 466-8555, Japan

<sup>3</sup> PRESTO, Japan Science and Technology Agency, 4-1-8 Honcho, Kawaguchi, Saitama 332-0012, Japan

\* Correspondence: tsunoda.satoshi@nitech.ac.jp; Tel.: +81-52-735-5218

**Table S1.** Amino acid alignments of bacteriorhodopsin (BR), *Cr\_ChR2* and *Gt\_CCR4*. The characteristic amino acids were detected in BR and *Cr\_ChR2*. In addition, amino acid numbers of each protein and transmembrane helix (TM) numbers are indicated.

|                          |    |    |    |    |     |     |     |     |     |     |     |     |
|--------------------------|----|----|----|----|-----|-----|-----|-----|-----|-----|-----|-----|
| No. in BR                | 44 | 45 | 52 | 59 | 63  | 85  | 89  | 90  | 96  | 118 | 214 | 216 |
| No. in <i>Cr_ChR2</i>    | 82 | 83 | 90 | 97 | 101 | 123 | 127 | 128 | 134 | 156 | 253 | 257 |
| No. in <i>Gt_CCR4</i>    | 75 | 76 | 84 | 90 | 94  | 116 | 120 | 121 | 127 | 149 | 242 | 246 |
| TM number                | 2  | 2  | 2  | 2  | 2   | 3   | 3   | 3   | 3   | 4   | 7   | 7   |
| BR (H <sup>+</sup> pump) | A  | I  | I  | S  | G   | D   | T   | H   | D   | M   | D   | K   |
| <i>Cr_ChR2</i>           | E  | E  | E  | E  | E   | E   | T   | C   | H   | D   | D   | K   |
| <i>Gt_CCR4</i>           | E  | E  | N  | T  | R   | D   | T   | C   | D   | A   | D   | K   |

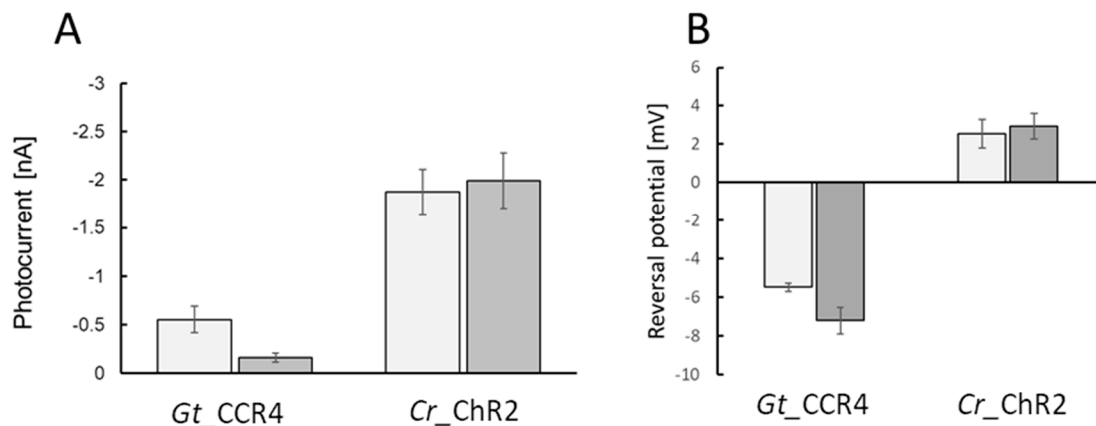

**Figure S1.** Ca<sup>2+</sup> photocurrents of *Gt\_CCR4* and *Cr\_ChR2*. **A**, Comparison of current amplitude of *Gt\_CCR4* and *Cr\_ChR2* in the presence of two Ca<sup>2+</sup> concentrations at -60 mV. Each channelrhodopsin expressed in ND7/23 cells was stimulated by 530 nm (*Gt\_CCR4*) and 480 nm (*Cr\_ChR2*) LED light (6.8 mW/mm<sup>2</sup>). A standard pipette solution was used. The bath solution contained (in mM) 60 NaCl, 1 KCl, 2 (white bar) or 40 (grey bar) CaCl<sub>2</sub>, 2 MgCl<sub>2</sub>, 76 (white bar) or 0 (grey bar) *N*-methyl D-glucamine, 10 HEPES, at pH 7.2. **B**, Comparison of reversal potentials of *Gt\_CCR4* and *Cr\_ChR2* in the presence of two Ca<sup>2+</sup> concentrations. Solution in each condition is the same as in **A**. (n = 3-6 cells).

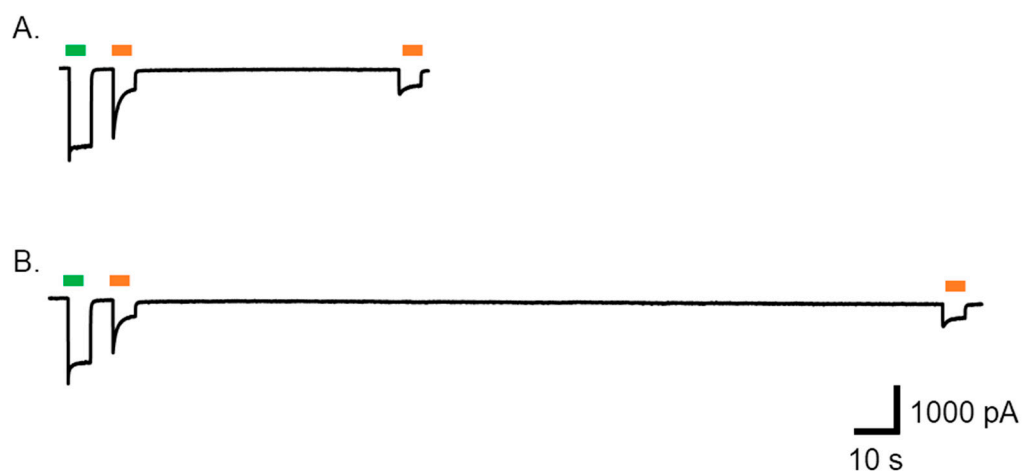

**Figure S2.** *Gt\_CCR4* has a long-lived and long wavelength-absorbing inactivated state. Standard solutions were used. Photocurrents at -60 mV are shown. **A**, After activation by 530 nm light shown in a green bar, 590 nm light (in yellow bar) reduced the current amplitude. After a 60 s dark period, the second 590 nm was applied. **B**, Dark period was prolonged to 3 min. The second 590 nm light still reduced the current, indicating a very stable inactivated state.
